# Supplementary material for: Achieving functional neuronal dendrite structure through sequential stochastic growth and retraction
Source: eLife journal article supplement (doi:10.7554/elife.60920), 2020-11-26
Supplement: figures [file elife-60920-figures-v3.pdf]

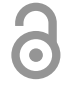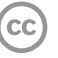

---

## Figures and figure supplements

Achieving functional neuronal dendrite structure through sequential stochastic growth and retraction

**André Ferreira Castro *et al***

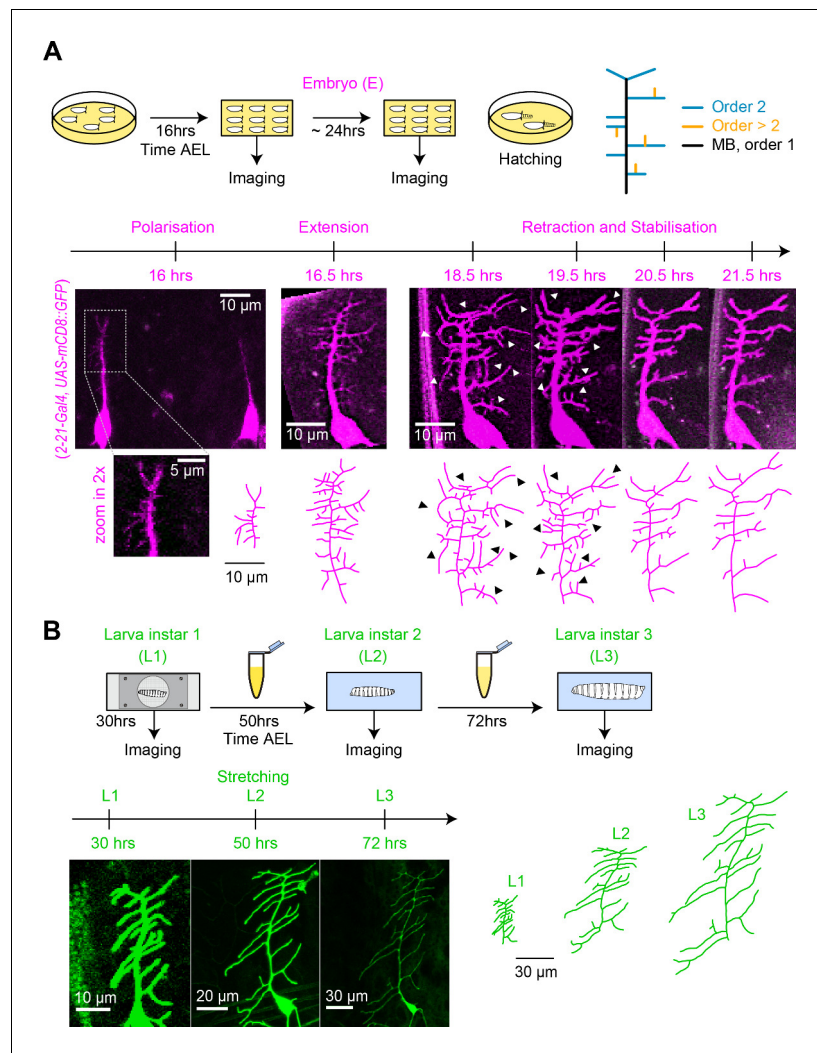

**Figure 1.** Distinct stages of c1vpda dendrite differentiation during embryonic and larval stages. **(A)** Imaging procedure throughout embryonic (E) stages. The eggs were imaged at higher temporal resolution in a time window ranging from 16–24 hrs AEL. Sketch (top row left) illustrating the experimental conditions, drawing (top row right) depicting the ordering of c1vpda branches (black: MB order 1, blue: lateral branch order 2, orange: lateral branch order > 2). Timeline and maximum intensity projections (middle row) of image stacks as well as reconstructions (bottom row) of a given representative c1vpda dendrite. White arrows in images and corresponding black arrows on reconstructions indicate exemplary changes between the time points (see main text). **(B)** Subsequent imaging of Larval instar (L) 1, 2, 3 stages with similar arrangements as in A. Times shown are AEL (after egg laying).

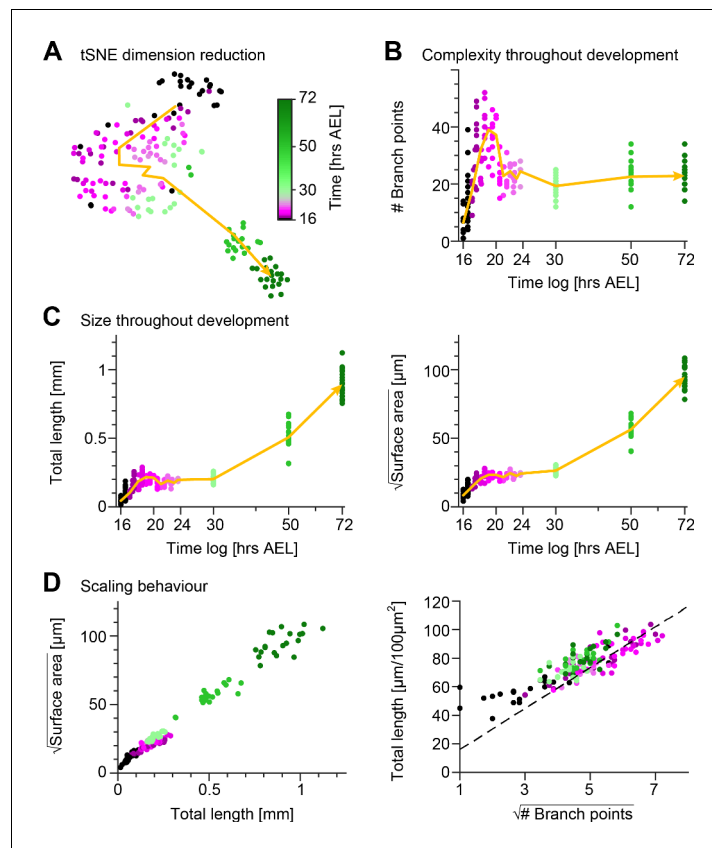

**Figure 2.** Quantification of c1vpda dendrite differentiation throughout development. (A) A t-distributed stochastic neighbour embedding (tSNE) plot showing the entire dataset of neuronal reconstructions using a 49—dimensional morphometric characterisation reduced to two dimensions. (B) Time course of the number of branch points during development (see also **Figure 6C**). (C) Time courses of the total length of dendrite cable (left) and square root of the surface area (right) during development (see also **Figure 6C**). (D) Scaling behaviour of the square root of the surface area against total length (left) and total length against number of branch points (right) showing the relationships expected from the optimal wire equations (**Cuntz et al., 2012; Baltruschat et al., 2020**). The dashed line shows the average scaling behaviour of simulated synthetic trees ( $n = 1,000$  simulations; see Materials and methods). In all panels, each dot represents one reconstruction with the colour scheme indicating imaging time AEL roughly dissecting embryonic (magenta) and larval (green) developmental stages (colour bar in A). The thick yellow arrows show trajectories averaging values of all reconstructions across two hour bins in A, and 1 hr bins in B and C for higher resolution. Data from  $n = 165$  reconstructions,  $n = 48$  neurons,  $n = 13$  animals. See also **Figure 2—figure supplement 1** for details on the scaling in the different stages of development.

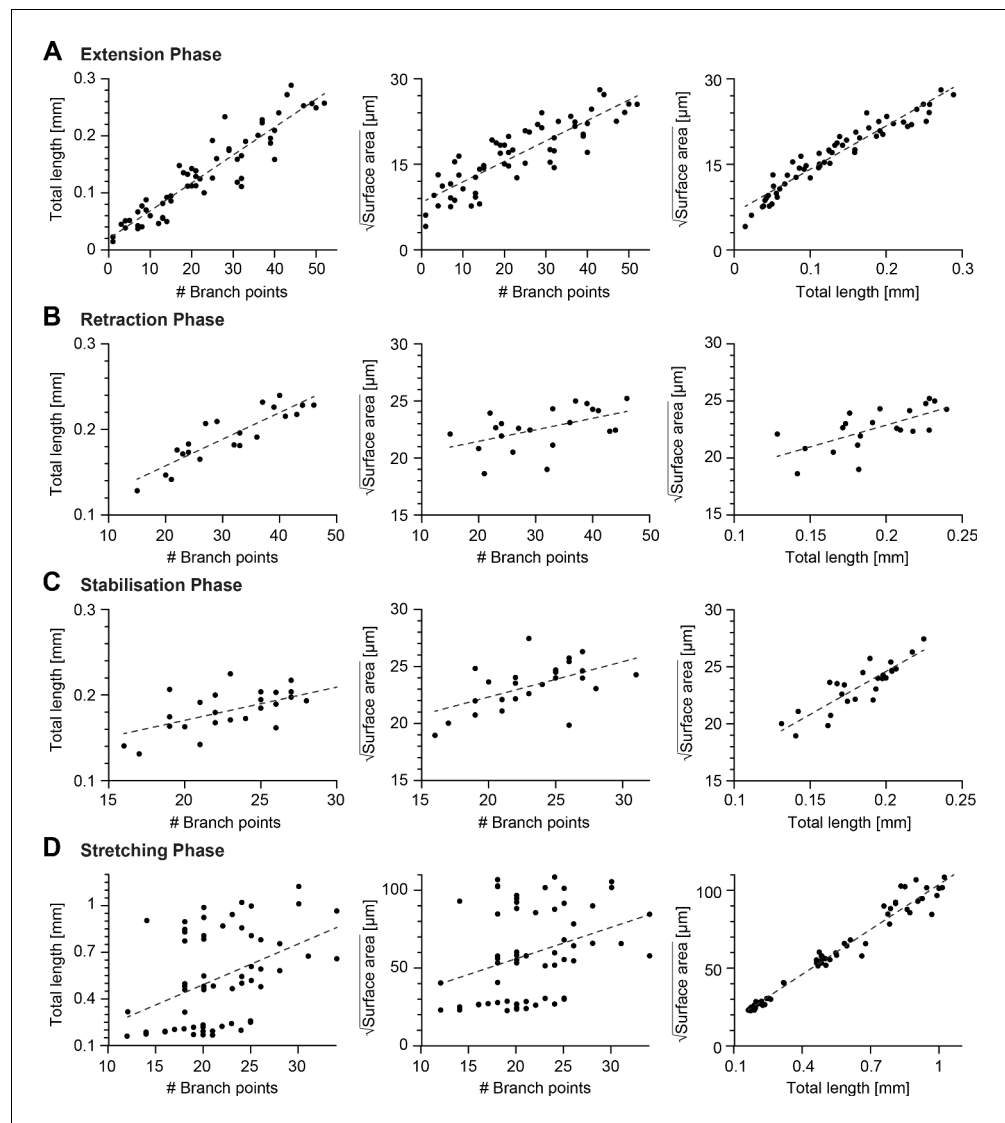

**Figure 2—figure supplement 1.** Scaling relations between key morphometrics during development. (A–D) Linear fits of the number of branch points vs total cable length, number of branch points vs the square root of the dendrite surface area (middle) and total cable length vs the square root of the dendrite surface area (right) during the extension phase (16–18.5 hrs AEL,  $n = 59$ , from left to right  $R^2 = 0.86$ ,  $R^2 = 0.73$ ,  $R^2 = 0.92$ ), retraction phase (18.5–20.6 hrs AEL,  $n = 21$ , from left to right  $R^2 = 0.77$ ,  $R^2 = 0.21$ ,  $R^2 = 0.41$ ), stabilisation phase (20.6–24 hrs AEL,  $n = 25$ , from left to right  $R^2 = 0.33$ ,  $R^2 = 0.27$ ,  $R^2 = 0.74$ ), scaling phase (24–72 hrs AEL,  $n = 60$ , from left to right  $R^2 = 0.17$ ,  $R^2 = 0.09$ ,  $R^2 = 0.97$ ). In all panels, each black dot represents one reconstruction (overall  $n = 165$ ) black-dashed lines represent the best-fit.

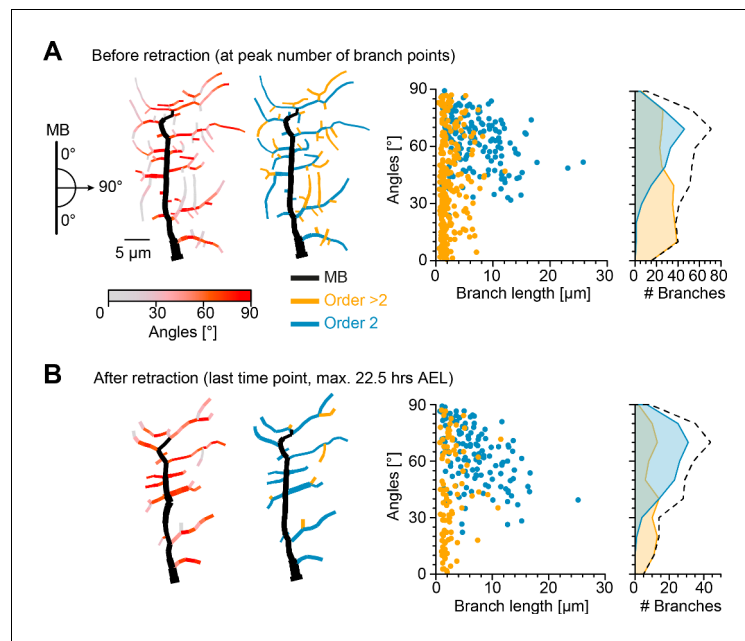

**Figure 3.** Retraction phase preferentially targets smaller, low orientation angle, higher-order lateral branches. **(A)** Sketch illustrating lateral branch orientation angle and dendrite morphology of a sample *c1vpda* sensory neuron before retraction. Morphology on the left side is colour coded by branch segment angles and morphology on the right is colour coded by branch length order (MB is coloured in black; see Materials and methods). On the right, histograms for branch length (one dot per branch) and number of branches per angle are shown separated by branch length order (blue: order 2, orange: order > 2,  $n = 429$  branches). Dashed line represents the overall distribution of number of branches per angle. **(B)** Similar visualisation but for dendrites after retraction ( $n = 223$  branches).

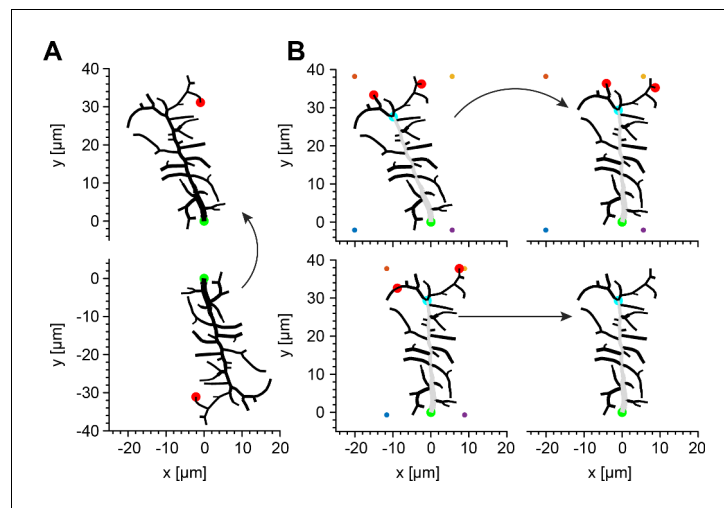

**Figure 3—figure supplement 1.** Illustration of the algorithm identifying the MB. (A) As a first step, the algorithm translates the reconstruction of an arbitrary dendritic tree (bottom) by setting the root to x- and y-coordinates (0, 0) and rotates it until the terminal of the longest path of the tree (red circle) is set to x-coordinate (0) and the y-coordinate is set to a positive value. (B) At each new iteration in a subsequent refinement of the rotation, a bounding box (coloured dots) is generated around the dendritic tree and the closest node to the top left corner, and to the top right corner are found (red circles). The first common branch point in the paths of these nodes is defined as the provisional last node of the MB (light blue circle) and the tree is rotated until this node is set to x-coordinate (0). This procedure is repeated until the branch point of the MB in the current iteration is the same as the one in the previous iteration. In all panels, green circles represent the root of the dendritic tree and grey branches represent the MB.

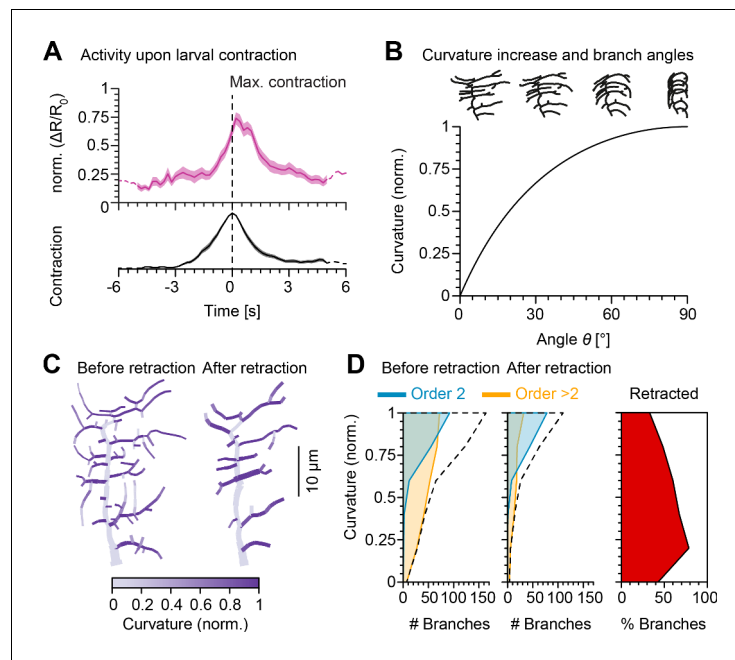

**Figure 4.** Retraction increases branch bending curvature during larval contraction potentially facilitating signal transduction. (A), (Top) Mean normalised  $\text{Ca}^{2+}$  responses of c1vpda dendrites during forward crawling. The signal was calculated as the fold change of the signal  $R = \frac{F_{\text{CaMP6m}}}{F_{\text{dTomato}}}$  in the fluorescence ratio  $\frac{\Delta R}{R_0}$  (see Materials and methods and **Figure 4—figure supplement 1**). The  $\frac{\Delta R}{R_0}$  signal amplitude was normalised for each trial. Data from six animals,  $n = 25$  neurons; solid pink line shows average values where data comes from  $n > 5$  neurons and dashed pink line where  $n < 5$  neurons. Standard error of the mean in pink shaded area. (Bottom) Average normalised contraction rate during crawling behaviour (similar plot as in top panel but in black colour). Segment contraction and  $\text{Ca}^{2+}$  responses were aligned to maximal segment contraction at  $t = 0$ s. (B) (Top row) Simulated contraction of a c1vpda morphology by wrapping around a cylinder. (Main panel) Relationship between normalised curvature increase experienced by a single branch as a function of its orientation angle  $\theta$ . (C) C1vpda dendrite morphologies before (left) and after (right) retraction. Morphologies are colour coded by local curvature increase during segment contraction. (D) Similar visualisation of the same data as in **Figure 3** but for curvature increase before and after retraction. Dashed line represents the overall distribution of number of branches per curvature increase. Rightmost panel additionally shows the distribution (%) of retracted branches by bending curvature increase (red shaded area).

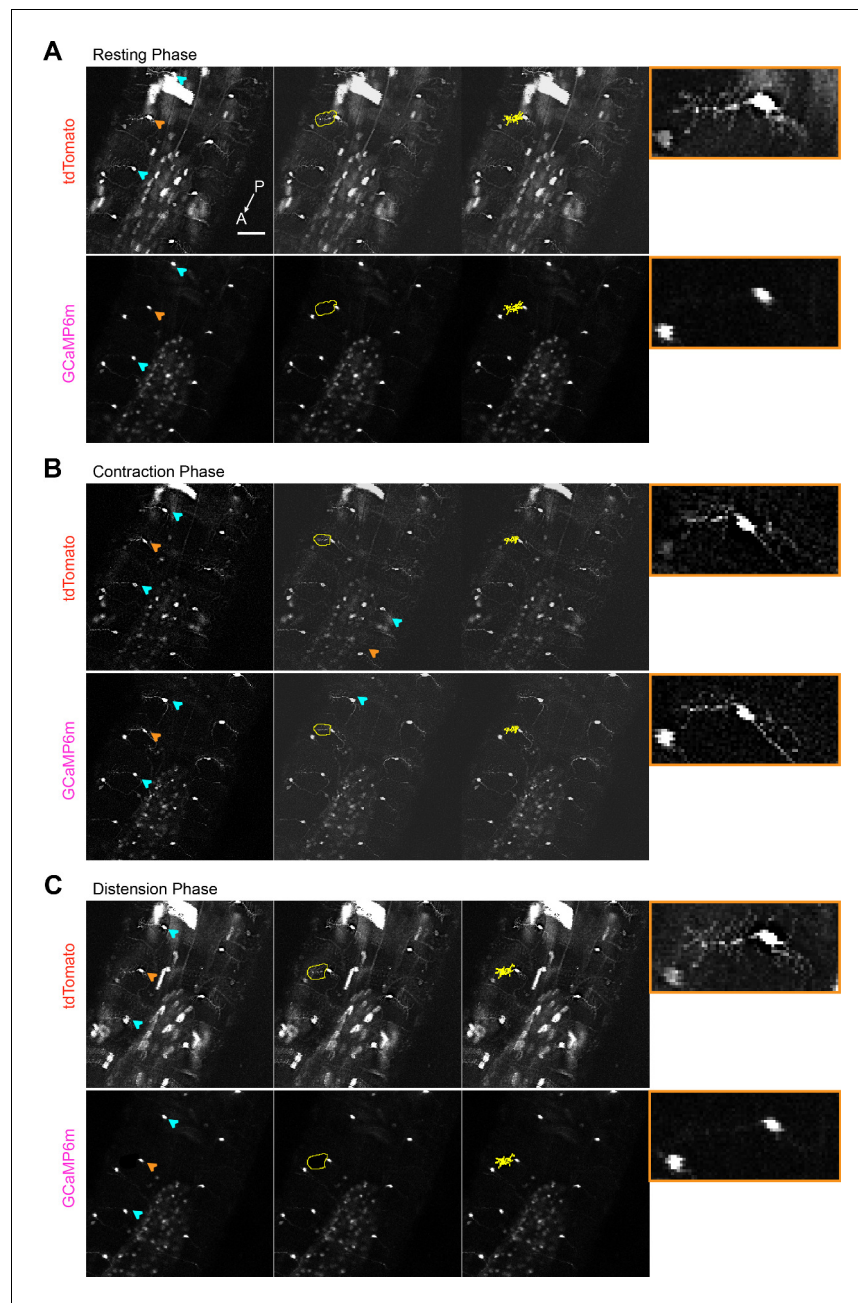

**Figure 4—figure supplement 1.** Calcium imaging of c1vpda dendrites during forward crawling. (A) Representative images of c1vpda cells using a line that expresses CD4-tomato (top panels) and GCaMP6m (Bottom panels) in c1vpda neurons (*w-; UAS-GCaMP6m; UAS-CD4-tdTomato, Gal4 2–21/MKRS*), showing the ventral view of the larval body during resting phase. The GCaMP6m signal was extracted from cell indicated by the orange arrow (left Panels). Illustrative rough ROI's (middle panels) used to generate the tight ROI's around the cell borders (right panels). The rightmost insets with orange borders show zoomed in images of the neuron indicated by the orange arrow in the left panels. In B, images showing increased GCaMP6m activity in c1vpda dendrites during contraction, but in C, GCaMP6m activity decreased back to baseline during distension. Scale bar, 50  $\mu$ m.



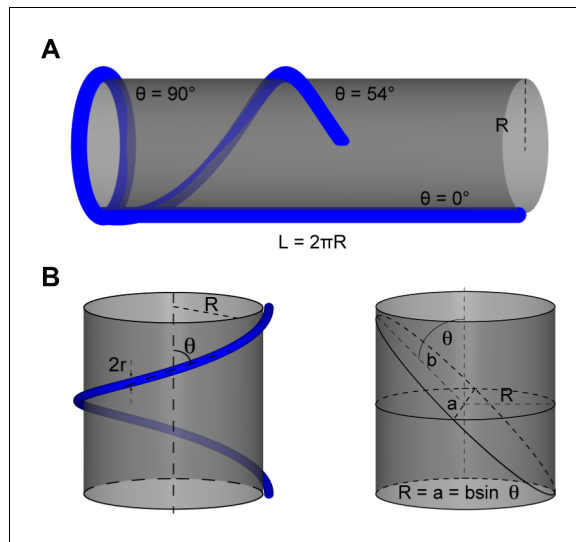

**Figure 4—figure supplement 2.** Tubular structure elliptical profile approximation. (A) Representative sketch of tubular structures, with different orientation angles, deformation while being wrapped around a cylindrical surface. (B) Illustration of tubular structure with diameter  $2r$  with orientation angle  $\theta$  wrapped around a cylinder with radius  $R$  (top panel). Representative elliptical profile of a tubular structure wrapped around a cylinder.  $b$  and  $a$  represent the axes of the ellipse.

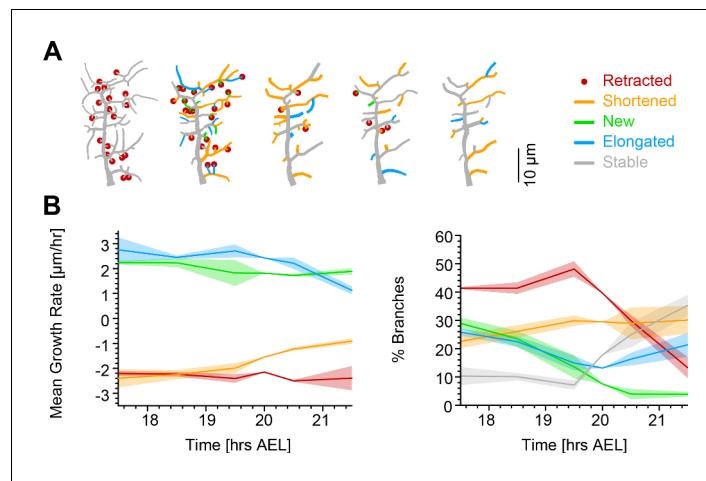

**Figure 5.** Single branch tracking analysis quantifies retraction phase dynamics. (A) Dynamics of retraction phase for one sample *c1vpda* dendritic morphology with branches coloured by their respective dynamics, red circles—to be retracted; orange—shortened; green—newly formed; blue—elongating; grey—stable. (B) (Left) Branch dynamics similar to A but quantified as growth rates ( $\frac{\mu\text{m}}{\text{hr}}$ ) for all branches of all dendrites tracked during the retraction phase,  $n = 1, 139$ ; same colours as in A. (Right) Assignment of branches to the five types in A as a function of time. Shading represents the standard error of the mean.

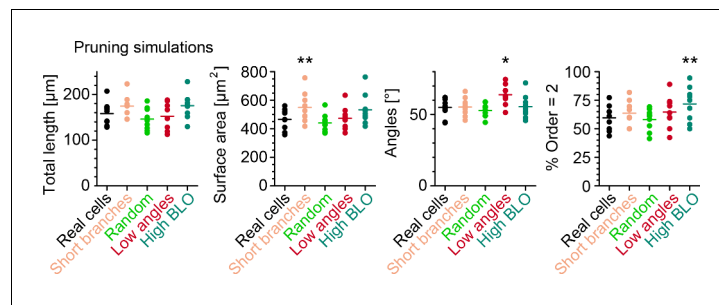

**Figure 5—figure supplement 1.** *In silico* simulations to quantify retraction phase dynamics. Key morphometrics comparing real neurons after retraction with simulated retraction schemes applied on the morphology before retraction. Each dot is one morphology, bars indicate mean, and stars indicate p-values as follows: \* $<0.05$ , \*\* $<0.01$  ( $n = 429$  branches,  $n = 9$  neurons, from six animals).

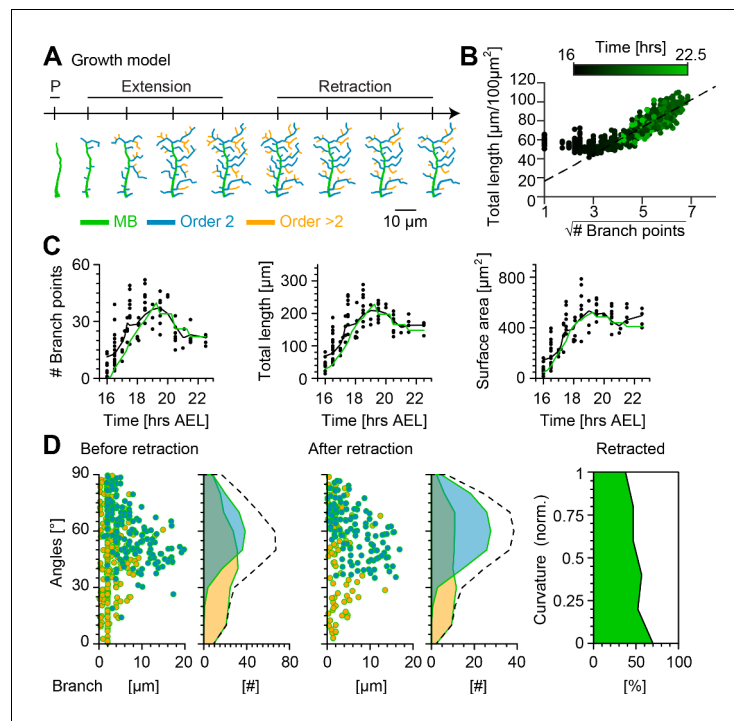

**Figure 6.** Computational growth model with stochastic retraction satisfies optimal wire constraints and replicates *c1vpda* dendrite growth. **(A)** Synthetic dendrite morphologies of a sample *c1vpda* during the entire embryonic development ordered by their respective developmental stages: polarisation (P), extension and retraction, until the stabilisation phase. **(B)** Scaling behaviour of total length against the square root of branch points of the trees generated using the random retraction growth model. The dashed line shows the average scaling behaviour of the simulated MST trees used in **Figure 2D** ( $n = 1,000$  simulations;  $R^2 = 0.98$ ; see Materials and methods). **(C)** Time course of the number of branch points ( $R^2 = 0.88$ ), total length of dendrite cable ( $R^2 = 0.95$ ) and surface area ( $R^2 = 0.94$ ) during development until the stabilisation phase. In all panels, each black dot represents one reconstruction ( $n = 90$ ) black solid lines represent the moving average of the real neurons and green solid lines represent the mean behaviour of the synthetic trees ( $n = 1,215$ ). **(D)** Representative visualisation of a random sample of synthetic trees before retraction (left, with same number of trees as in experimental data) histograms for branch length (one dot per branch) and number of branches per angle are shown separated by branch length order (Blue: order 2, Orange: order > 2). Dashed line represents the overall distribution of number of branches per angle. Similar visualisation (middle) of dendrites after retraction as well as summary histograms. Rightmost panel shows the distribution (%) of retracted branches by bending curvature increase (green shaded area).

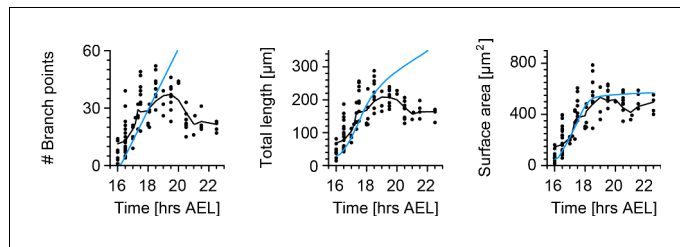

**Figure 6—figure supplement 1.** Growth model without retraction does not replicate c1vpda dendrite growth. Time course of the number of branch points (left), total length of dendrite cable (middle) and surface area (right) during embryonic development. Same arrangement and same data as in **Figure 6B** but for the growth model without retraction.

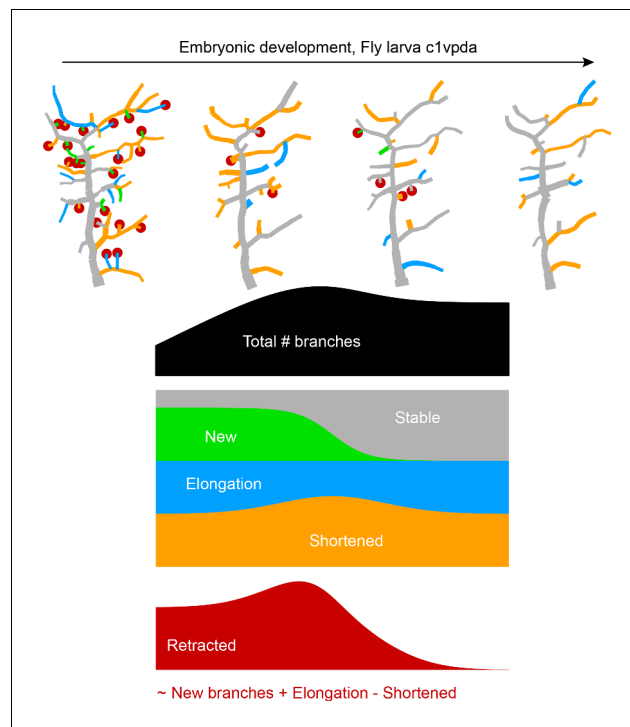

**Appendix 1—figure 1.** Sketch that illustrates visually the dynamics of branching during embryonic development of class I dendrites.
